# Supplementary material for: A 5-Year Observational Study of Patients With Treatment-Resistant Depression Treated With Vagus Nerve Stimulation or Treatment as Usual: Comparison of Response, Remission, and Suicidality
Source: Atypon-hosted journal article supplement (doi:10.1176/appi.ajp.2017.16010034), 2017-03-31
Supplement: appi.ajp.2017.16010034.ds001.pdf [file appi.ajp.2017.16010034.ds001.pdf]

 


Psychiatry Online
