# Supplementary material for: A 5-Year Observational Study of Patients With Treatment-Resistant Depression Treated With Vagus Nerve Stimulation or Treatment as Usual: Comparison of Response, Remission, and Suicidality
Source: Atypon-hosted journal article supplement (doi:10.1176/appi.ajp.2017.16010034), 2017-03-31
Supplement: appi.ajp.2017.16010034.ds002.pdf [file appi.ajp.2017.16010034.ds002.pdf]

## Investigational Sites

| <b>Study Site</b>                                 | <b>Physician Name</b>                                      | <b>Physician Address</b>                                                                            |
|---------------------------------------------------|------------------------------------------------------------|-----------------------------------------------------------------------------------------------------|
| 3c Methodist Hospital                             | Anne Gilbert, MD                                           | Indianapolis Psychiatric Associates<br>9670 E Washington Street, Suite 120<br>Indianapolis IN 46229 |
| Alamo Superior Research, Inc                      | Joseph Simpson, MD                                         | 4242 Medical Drive<br>Suite 6350<br>San Antonio, TX 78229                                           |
| Alexian Brothers Behavioral Health Hospital       | Anthony D'Agostino, MD                                     | 800 Biesterfield Road<br>Elk Grove Village, IL 60007                                                |
| Arthur Holt, Private Practice                     | Arthur R. Holt, MD                                         | 3518 Veteran's Parkway<br>Suite A<br>Columbus, GA 31904                                             |
| Baylor College of Medicine                        | Melissa Martinez, MD                                       | One Baylor Plaza BCM 350<br>Houston, TX 77030                                                       |
| Suburban Psychiatric Associates                   | Adam Ashton, MD                                            | Suburban Psychiatric Associates<br>85 Bryant Woods South<br>Amherst, NY 14228                       |
| Case Western (Univ Hospitals Case Medical Center) | Keming Gao, MD<br>Susan Kimmel, MD<br>Prashant Gajwani, MD | Mood Disorder Program<br>10524 Euclid Avenue<br>12th Floor<br>Cleveland, Ohio 44106                 |
| Cedars-Sinai Hospital                             | Robert Cohen, MD                                           | 8730 Alden Drive<br>Thalians Building E135<br>Los Angeles, CA 90048                                 |
| Century Health                                    | Basanti Basu, MD                                           | 2515 North Main Street<br>Findlay, OH 45840                                                         |
| Center for Anxiety and Depression                 | David Dunner, MD                                           | 7525 SE 24th Street<br>Suite 400<br>Mercer Island, WA 98040                                         |
| Claghorn-Lesem Research Clinic, Ltd.              | Michael Lesem, MD                                          | 1010 Waverly<br>Houston, TX 77008                                                                   |
| Clinical Insights                                 | Lawrence Adler, MD                                         | 7310 Ritchie Highway<br>Suite 512<br>Glen Burnie, MD 21061                                          |
| Clinical Research Institute                       | Michael Burke, MD                                          | 1010 N. Kansas, Suite 3049<br>Wichita, KS 67214                                                     |
| Dent Neurologic Institute                         | Horacio Capote, MD                                         | 3980 Sheridan Drive,<br>Suite 200<br>Amherst, NY 14226                                              |

| <b>Study Site</b>                    | <b>Physician Name</b>                 | <b>Physician Address</b>                                                                                |
|--------------------------------------|---------------------------------------|---------------------------------------------------------------------------------------------------------|
| Dupage Mental Health Services        | Syed Ali, MD                          | 1751 S. Naperville Road, Suite 207<br>Wheaton, IL 60187                                                 |
| Dwight Bearden, Private Practice     | Dwight Bearden, MD                    | 567 Arlington Place<br>Macon, GA 31201                                                                  |
| Fair Oaks Psychiatric Associates     | Janak K. Mehtani, MD                  | 2951 Fulton Avenue<br>Sacramento, CA 95821                                                              |
| Florida Atlantic University          | Peter Holland, MD                     | 777 Glades Road<br>Building AZ-79<br>Boca Raton, FL 33431                                               |
| Henry Ford Health Services           | Ed Coffey, MD                         | 6501 Veterans Pkwy<br>1 Ford Place, Ste 2F<br>Detroit, MI 48202-3450                                    |
| Jamaica Hospital                     | Martha Edelman, MD<br>Isak Isakov, MD | Department of Psychiatry<br>8900 Van Wyck Expressway<br>Jamaica, NY 11418                               |
| Loma Linda University                | Ronald Warnell, MD                    | 24880 Prospect Ave<br>Loma Linda, CA 92354<br>11374 Mountain View Avenue, Ste A<br>Loma Linda, CA 92354 |
| Louisiana Clinical Research, LLC     | Greg Seal, MD<br>Guy Brannon, MD      | 1535 Irving Place<br>Shreveport, Louisiana 71101                                                        |
| McGarth Clinic                       | Harold McGarth, MD                    | 14400 John Humphrey Drive<br>Suite 200<br>Orland Park, IL 60462                                         |
| Mark Zetin, Private Practice         | Mark Zetin, MD                        | 12443 Lewis Street<br>Suite 101<br>Garden Grove, CA 92840                                               |
| Massachusetts General Hospital       | Darin Dougherty, MD                   | 149 13th Street<br>CNY2612 Bldg 149<br>Charleston, MA 02129                                             |
| Medical College of Virginia          | Ananda Pandurangi, MD                 | 1200 E. Broad St., Ste 8-303<br>Richmond, VA 23298                                                      |
| Medical College of Wisconsin         | Harold Harsch, MD                     | 8701 Watertown Plank Road<br>Milwaukee, WI 53226                                                        |
| Medical University of South Carolina | Mark S. George, MD<br>Ziad Nahas, MD  | 67 President Street<br>Room 502 North<br>Charleston, SC 29403                                           |
| MG Martelli, MD, PC and Associates   | Miguel Martelli, MD                   | #7 St. Andrews Court<br>Brunswick, GA 31520                                                             |

| <b>Study Site</b>                        | <b>Physician Name</b>                                     | <b>Physician Address</b>                                                                                                  |
|------------------------------------------|-----------------------------------------------------------|---------------------------------------------------------------------------------------------------------------------------|
| New York State Psychiatric Institute     | Joshua Berman, MD<br>Peter Bulow, MD<br>Sarah Lisanby, MD | Division of Experimental Therapeutics<br>NYS Psychiatric Institute<br>1051 Riverside Drive, Unit 21<br>New York, NY 10032 |
| New York University of Medical Center    | David Ginsberg, MD                                        | Department of Psychiatry<br>530 First Avenue, Suite 7D<br>New York, NY 10032                                              |
| NorthShore University Health System      | Lawrence Bernstein, MD                                    | Evanston Hospital<br>Department of Neurology<br>2650 Ridge Avenue, Burch 300B<br>Evanston, IL 60201                       |
| Northwest Behavioral Research Center     | Michael Banov, MD                                         | 108 Margaret Avenue<br>Marietta, GA 30060                                                                                 |
| Oregon Health and Sciences University    | George, Keepers, MD                                       | 3181 SW Sam Jackson Park Road GH255<br>OHSU, UHN-80<br>Room 2316<br>Portland, OR 97239                                    |
| PACT Atlanta LLC                         | Todd Antin, MD                                            | 465 Winn Way #221<br>Decatur, GA 30030                                                                                    |
| Pharmasite Research Inc.                 | Robert Lehman, MD                                         | 1314 Bedford Avenue<br>Suite 211<br>Baltimore, MD 21208                                                                   |
| Psych Care Consultants                   | Azfar Malik, MD                                           | 5000 Cedar Plaza Parkway<br>Suite #350<br>St. Louis, MO 63128                                                             |
| Psychiatric and Behavioral Solutions     | Frederick Reimherr, MD                                    | 1522 South 1100 East<br>Salt Lake City, Utah 84105                                                                        |
| Psychiatric Medicine Associates          | John Zajecka, MD                                          | 4711 Golf Road<br>Suite 1200<br>Skokie, IL 60076                                                                          |
| Psychiatric Recovery                     | Craig Vine, MD                                            | 2550 University Avenue West<br>Suite 229 North<br>St. Paul, MN 55114                                                      |
| Rochester Center for Behavioral Medicine | Joel Young, MD                                            | 441 South Livernois<br>Suite 205<br>Rochester Hills, MI 48307                                                             |

| <b>Study Site</b>                                        | <b>Physician Name</b>   | <b>Physician Address</b>                                                                       |
|----------------------------------------------------------|-------------------------|------------------------------------------------------------------------------------------------|
| Sheppard Pratt Health Systems                            | Scott Aaronson, MD      | 6501 North Charles Street, Suite A309<br>Baltimore, MD 21285-6815                              |
| State University of New York Upstate Medical University  | Thomas Schwartz, MD     | Room 1702<br>750 E. Adams Street<br>13210                                                      |
| Sutter Institute for Medical Research                    | Theodore Goodman, MD    | 2801 Capitol Avenue, Suite 400<br>Sacramento, CA 95816                                         |
| The Mech Center                                          | Arnold Mech, MD         | 7500 San Jacinto<br>Plano, TX 75024                                                            |
| University of California San Diego                       | Mounir Soliman, MD      | UCSD Department of Psychiatry<br>140 Arbor Drive, 4 <sup>th</sup> Floor<br>San Diego, CA 92103 |
| University of Arizona                                    | Francisco Moreno, MD    | 1501 N. Campbell Avenue<br>Tucson, Arizona 85724                                               |
| University of Connecticut Health Center                  | Leighton Huey, MD       | Department of Psychiatry<br>263 Farmington Avenue<br>Farmington, CT 06030-1410                 |
| University of Florida                                    | Herbert Ward, MD        | 100 Newell Drive<br>Suite L4-100<br>Gainesville, FL 32611                                      |
| University of South FL                                   | Francisco Fernandez, MD | 4202 East Fowler Avenue, FAO 126<br>Tampa, Florida 33620                                       |
| University of Massachusetts Medical School               | Anthony Rothschild, MD  | Psychiatry Dept.<br>361 Plantation Street<br>Worcester, MA 01605                               |
| University of Mississippi Medical Center                 | Joseph Kwentus, MD      | Psychopharmacology & Clinical Trials<br>2500 North State Street<br>Jackson, MS 39216           |
| UPENN                                                    | Mahendra Bhati MD       | 3535 Market Street,<br>Suite 670<br>Philadelphia, PA<br>19104-3309                             |
| University of Pittsburgh                                 | Robert Howland, MD      | Department of Psychiatry<br>3811 O'Hara Street<br>Pittsburgh, PA 15213                         |
| University of Texas Health Science Center at San Antonio | Peter Thompson, MD      | 7703 Floyd Curl Drive,<br>MSC 7734<br>San Antonio, TX<br>78229-3900                            |

| <b>Study Site</b>                               | <b>Physician Name</b>                     | <b>Physician Address</b>                                                                    |
|-------------------------------------------------|-------------------------------------------|---------------------------------------------------------------------------------------------|
| University of Texas Southwestern Medical Center | Mustafa Husain, MD                        | Department of Psychiatry<br>PO Box 842265<br>Dallas, TX 75284-2265                          |
| Valdosta Psychiatric Associates, LLC            | Joel Morgan, MD                           | 3541 North Crossing Circle<br>Valdosta, GA 31602                                            |
| Wake Forest University                          | James Kimball, MD<br>Peter Rosenquist, MD | Dept. of Psychiatry<br>Medical Center Blvd<br>Winston, Salem, NC 27157-1087                 |
| Washington University in St. Louis              | Keith Isenberg, M.D.<br>Keith Garcia, MD  | 660 S. Euclid Avenue<br>St. Louis, MO 63110                                                 |
| Washington University in St. Louis              | Charles Conway, MD                        | Department of Psychiatry<br>Campus Box 8134<br>660 South Euclid<br>St. Louis, MO 63110-1093 |
